# Supplementary material
Source: PubMed Central journal article supplement (PMC3739491)
Supplement: supp_12-11427_IOVS-12-11427-s01.pdf [file supp_12-11427_IOVS-12-11427-s01.pdf]

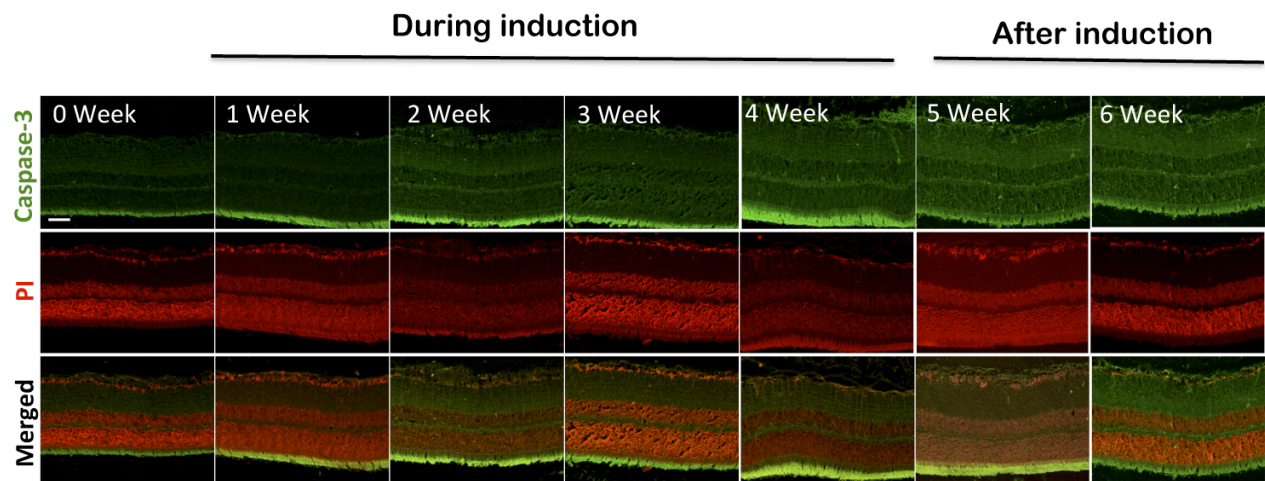

**Supplementary Figure 1:** Immunofluorescence analysis showing the expression of caspase-3 in the retinal ganglion cells (RGC) layer during 4 weeks of induction of glaucoma followed by two additional weeks without induction. An increased expression of caspase-3 starting on the second week of induction was observed. Note that at the second week, a significant increase in IOP and a reduction in the RGC counting were also observed in glaucomatous animals. PI: propidium iodide. Bar = 50  $\mu$ m.
